# Supplementary material for: Conversion of the Sensor Kinase DcuS to the Fumarate Sensitive State by Interaction of the Bifunctional Transporter DctA at the TM2/PASC-Linker Region
Source: MDPI journal article supplement (doi:10.3390/microorganisms9071397), 2021-06-28
Supplement: s1 [file s1]

**Figure S1**

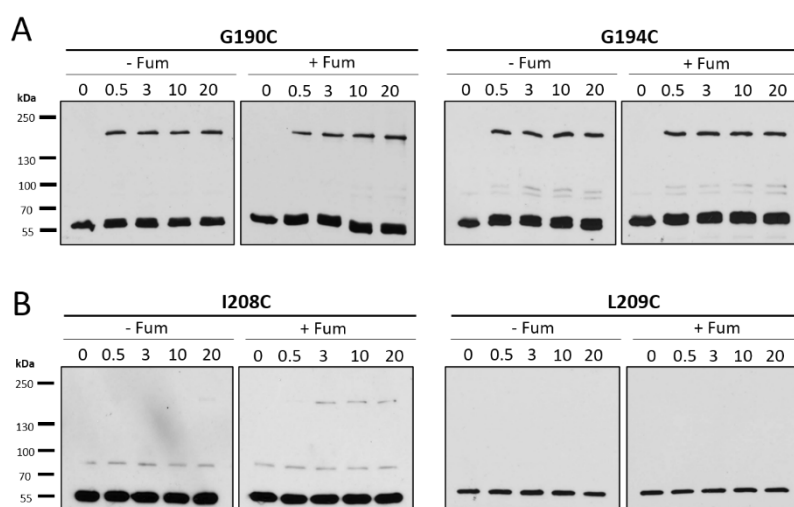

**Figure S1. Detection of DcuS TM2 (G190C, G194C) (A) or Linker variants (I208C, L209C) (B), after CL of DctA deficient bacteria (IMW660) with Cu<sup>2+</sup> phenanthroline.** Cross-linking was performed as described in [13]. CL-products were detected by chemiluminescence after non-reducing SDS-PAGE and Western blot. Scans of the X-ray films are shown. The reaction time is shown above the scans (0 to 20 min) and the absence (- Fum) or presence (+ Fum) of fumarate is indicated, as is the respective DcuS variant.

**Table S1. Strains and plasmids used.**

| Strain    | Genotype                                                                                                                                                                                                                              | Reference  |
|-----------|---------------------------------------------------------------------------------------------------------------------------------------------------------------------------------------------------------------------------------------|------------|
| BTH101    | F <sup>-</sup> , <i>cya</i> -99, <i>araD</i> 139, <i>galE</i> 15, <i>galK</i> 16, <i>rpsL</i> 1 ( <i>Str<sup>r</sup></i> ), <i>hsdR</i> 2, <i>mcrA</i> 1, <i>mcrB</i> 1                                                               | [47]       |
| C43(DE3)  | F <sup>-</sup> , <i>ompT</i> , <i>gal</i> , <i>dcm</i> , <i>lon</i> , <i>hsdSB</i> ( <i>rB-mB</i> -), $\lambda$ (DE3 [ <i>lacI lacUV5-T7p07 ind1 sam7 nin5</i> ]), spontaneous mutation of BL21(DE3) to overproduce membrane proteins | [48]       |
| JW4086    | F <sup>-</sup> , $\Delta$ ( <i>araD-araB</i> )567, $\Delta$ <i>lacZ</i> 4787(:: <i>rrnB</i> -3), $\lambda$ <sup>-</sup> , <i>rph</i> -1, $\Delta$ ( <i>rhaD-rhaB</i> )568, $\Delta$ <i>dcuS</i> 751::kan, <i>hsdR</i> 514             | [49]       |
| JW3496    | F <sup>-</sup> , $\Delta$ ( <i>araD-araB</i> )567, $\Delta$ <i>lacZ</i> 4787(:: <i>rrnB</i> -3), $\lambda$ <sup>-</sup> , $\Delta$ <i>dctA</i> 783::kan, <i>rph</i> -1, $\Delta$ ( <i>rhaD-rhaB</i> )568, <i>hsdR</i> 514             | [49]       |
| IMW660    | C43(DE3) but <i>dcuS</i> ::FRT, <i>dctA</i> ::FRT                                                                                                                                                                                     | This study |
| pKT25     | C-Terminal T25 protein fusion plasmid, pSU40 derivative, KanR                                                                                                                                                                         | [50]       |
| pKNT25    | N-Terminal T25 protein fusion plasmid, pSU40 derivative, KanR                                                                                                                                                                         | [50]       |
| pUT18     | N-Terminal T18 protein fusion plasmid, pUC19 derivative, AmpR                                                                                                                                                                         | [50]       |
| pUT18C    | C-Terminal T18 protein fusion plasmid, pUC19 derivative, AmpR                                                                                                                                                                         | [50]       |
| pKT25-Zip | <sup>T25</sup> Zip expression plasmid, pKT25 derivative, KanR                                                                                                                                                                         | [47]       |
| pMW336    | His <sub>6</sub> -DcuS expression plasmid but DcuS 199S-C471S, pET28-derivative (Kan <sup>r</sup> )                                                                                                                                   | [6]        |
| pMW336    | His <sub>6</sub> -DcuS expression plasmid but DcuS 199S-C471S, pET28-derivative (Kan <sup>r</sup> )                                                                                                                                   | [6]        |
| pMW429    | <sup>T18</sup> DcuS expression plasmid, pUT18C derivative, AmpR                                                                                                                                                                       | This study |
| pMW1911   | <sup>T18</sup> PASc expression plasmid, pUT18C derivative, AmpR                                                                                                                                                                       | This study |
| pMW1912   | <sup>T18</sup> PASc-Kinase expression plasmid, pUT18C derivative, AmpR                                                                                                                                                                | This study |
| pMW1913   | <sup>T18</sup> L-PASc expression plasmid, pUT18C derivative, AmpR                                                                                                                                                                     | This study |
| pMW1914   | <sup>T18</sup> L-PASc-Kinase expression plasmid, pUT18C derivative, AmpR                                                                                                                                                              | This study |
| pMW1126   | DctA <sub>400-428</sub> -T25 expression plasmid, pKNT25 derivative, KanR                                                                                                                                                              | This study |
| pMW1915   | <sup>T18</sup> L <sup>-1</sup> -PASc expression plasmid, pUT18C derivative, AmpR                                                                                                                                                      | This study |
| pMW1916   | <sup>T18</sup> L <sup>-2</sup> -PASc expression plasmid, pUT18C derivative, AmpR                                                                                                                                                      | This study |
| pMW1917   | <sup>T18</sup> L <sup>-3</sup> -PASc expression plasmid, pUT18C derivative, AmpR                                                                                                                                                      | This study |
| pMW1918   | <sup>T18</sup> L <sup>-4</sup> -PASc expression plasmid, pUT18C derivative, AmpR                                                                                                                                                      | This study |
| pMW1919   | <sup>T18</sup> L <sup>-5</sup> -PASc expression plasmid, pUT18C derivative, AmpR                                                                                                                                                      | This study |

|         |                                                                |            |
|---------|----------------------------------------------------------------|------------|
| pMW858  | <sup>T25</sup> DctA expression plasmid, pKT25 derivative, KanR | This study |
| pMW1851 | pMW336 but DcuS-I208C (KanR)                                   | [12]       |
| pMW1852 | pMW336 but DcuS-L209C (KanR)                                   | [12]       |
| pMW2522 | pMW336 but DcuS-G190C (KanR)                                   | [13]       |
| pMW2526 | pMW336 but DcuS-G190C (KanR)                                   | [13]       |
| pMW2685 | pMW336 but DcuS-R224C (KanR)                                   | This study |
